# Supplementary material
Source: HighWire-hosted journal article supplement (https://cmaj.ca/highwire/filestream/58468/field_highwire_adjunct_files/0/cost-regier-appendix2.pdf)
Supplement: cost-regier-appendix2.pdf [file cost-regier-appendix2.pdf]

## Appendix 2: Model assumptions

| Self-management start-up costs | Cost per patient (SD*), \$ |
|--------------------------------|----------------------------|
| Training the pharmacist        | 4                          |
| Pharmacist training patient    | 63                         |
| Point of care device           | 1 500                      |
| Total (base case)              | 1 567 (160)                |

| Annual costs        | Cost per patient (SD*), \$ |                 |
|---------------------|----------------------------|-----------------|
|                     | Physician-management       | Self-management |
| INR tests           | 210                        | 268             |
| Phone consultations | 48                         | 51              |
| Face-to-face visit  | 99                         | 33              |
| Total (base case)   | 357 (36)                   | 352 (36)        |

| Event                  | Cost per event (SD*), \$ |
|------------------------|--------------------------|
| Major thrombotic†      | 16 604 (1 673)           |
| Major hemorrhagic†     | 6 003 (830)              |
| Minor hemorrhagic†     | 91 (36)                  |
| Disabled, thrombotic§  | 47 960 (5 107)           |
| Disabled, hemorrhagic§ | 39 535 (3 464)           |
| Death                  | 1 700                    |

| Utilities                               | EQ-5D weight | SG weight¶ |
|-----------------------------------------|--------------|------------|
| Stroke                                  |              |            |
| Independent                             | 0.70         | 0.91       |
| Moderate-severe disability              | 0.19         | 0.61,0.64  |
| Major-moderate (years following stroke) | 0.33         | NA         |
| Major hemorrhage                        |              |            |
| Independent                             | 0.80         | 0.841      |
| Moderate-severe disability              | 0.69         | NA         |
| Major (years following event)           | 0.80         | NA         |
| Minor hemorrhage                        | 1            | 0.95       |
| No event                                | 1            | 0.95       |
| Death                                   | 0            | 0          |

Note: SD = standard deviation, INR = international normalized ratio, SG = standard gamble, NA = not available.

\*SD generated assuming  $\pm 25\%$  change in cost (normally distributed).

†Includes cost of rehabilitation for 1 year.

‡Includes complete blood count, INR test and visit to emergency department.

§Includes cost of long-term care.

¶SG weights used in deterministic sensitivity analysis.
